# Supplementary material
Source: PubMed Central journal article supplement (PMC10082651)
Supplement: NIHMS1888264-supplement-Supplementary_table.pdf [file NIHMS1888264-supplement-Supplementary_table.pdf]

## Supplementary Online Content

Spong CY, Bianchi DW. Populations in Research. *JAMA*. doi:10.1001/jama.2017.19138

**eTable.** Approximately 58% of the Total US Population Are Not Typically Included in Research Studies (Pregnant Women, Children, Older People, Those With Intellectual and Physical Disabilities)

This supplementary material has been provided by the authors to give readers additional information about their work.

eTable. Approximately 58% of the Total US Population Are Not Typically Included in Research Studies (Pregnant Women, Children, Older People, Those With Intellectual and Physical Disabilities)<sup>a</sup>

|                                             | Approximate No. of People | Source                                                                                                                                                                                        |
|---------------------------------------------|---------------------------|-----------------------------------------------------------------------------------------------------------------------------------------------------------------------------------------------|
| Total US population                         | 325 000 000               | <a href="http://www.worldometers.info/world-population/us-population">http://www.worldometers.info/world-population/us-population</a>                                                         |
| Pregnant women                              | 6 300 000                 | <a href="http://www.statisticbrain.com/pregnancy-statistics">http://www.statisticbrain.com/pregnancy-statistics</a>                                                                           |
| Children                                    | 73 000 000                | <a href="https://www.childstats.gov/americaschildren/tables/pop1.asp">https://www.childstats.gov/americaschildren/tables/pop1.asp</a>                                                         |
| Age >65 y                                   | 46 200 000                | <a href="https://www.census.gov/newsroom/facts-for-features/2016/cb16-ff08.html">https://www.census.gov/newsroom/facts-for-features/2016/cb16-ff08.html</a>                                   |
| Intellectually and developmentally disabled | 6 500 000                 | <a href="http://www.specialolympics.org/Sections/Who_We_Are/What_Is_Intellectual_Disability.aspx">http://www.specialolympics.org/Sections/Who_We_Are/What_Is_Intellectual_Disability.aspx</a> |
| Physically disabled                         | 56 700 000                | <a href="https://www.census.gov/newsroom/releases/archives/miscellaneous/cb12-134.html">https://www.census.gov/newsroom/releases/archives/miscellaneous/cb12-134.html</a>                     |

<sup>a</sup>These numbers are approximate to provide a general impact; the numbers do not account for overlap between categories.
